# Supplementary material for: Genome-wide DNA methylation dynamics during epigenetic reprogramming in the porcine germline
Source: Springer Nature journal article supplement (doi:10.1186/s13148-021-01003-x), 2021-02-03

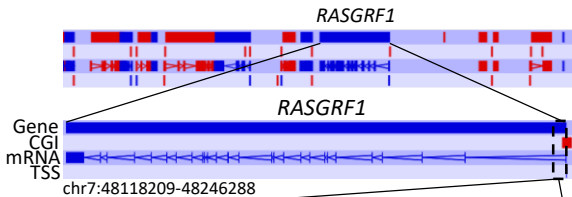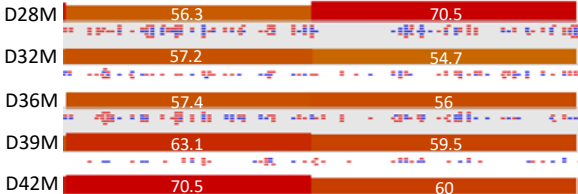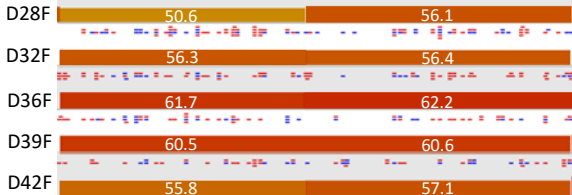

Supplement: 13148_2021_1003_MOESM3_ESM.pdf [file 13148_2021_1003_MOESM3_ESM.pdf]
